# Supplementary material
Source: publisher figshare collection journal article supplement (https://acs.figshare.com/ndownloader/files/14534924)
Supplement: Supplementary file 1 [file 14534924]

## Supplementary Information

### **A Flexible and Stable Interpenetrated Indium-Pyridylcarboxylate Framework with Breathing Behaviours and High Selective Adsorption of Cationic Dyes**

*Bin Zhang,<sup>a,b</sup> Qian-Qian Chu,<sup>b</sup> Ke-Fen Yue,<sup>\*a</sup> Shi-Hui Zhang,<sup>a</sup> Bo Liu<sup>\*b</sup> and Yao-Yu Wang<sup>a</sup>*

a. Key Laboratory of Synthetic and Natural Functional Molecule Chemistry of the Ministry of Education, Shaanxi Key Laboratory of Physico-Inorganic Chemistry, College of Chemistry & Materials Science, Northwest University, Xi'an 710069, P. R. China. E-mail: ykflyy@nwu.edu.cn

b. College of Chemistry & Pharmacy, Northwest A&F University, Yangling 712100, P. R. China. E-mail: chemliubo@nwsuaf.edu.cn

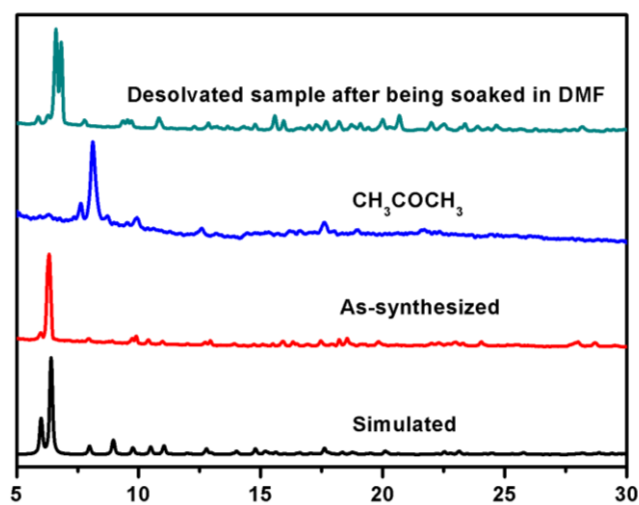

**Figure S1.** PXRD patterns of **1** simulated from the X-ray single-crystal structure, as-synthesized, desolvated sample and desolvated sample after being soaked in water of **1**.

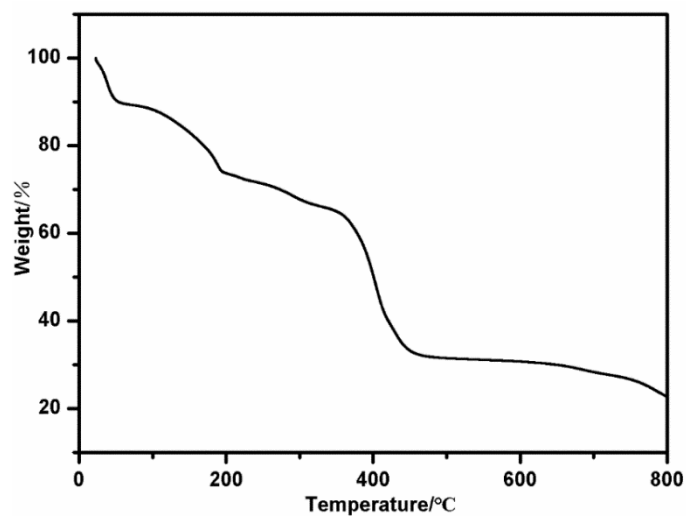

**Figure S2.** TGA plots of **1** under N<sub>2</sub> environment.

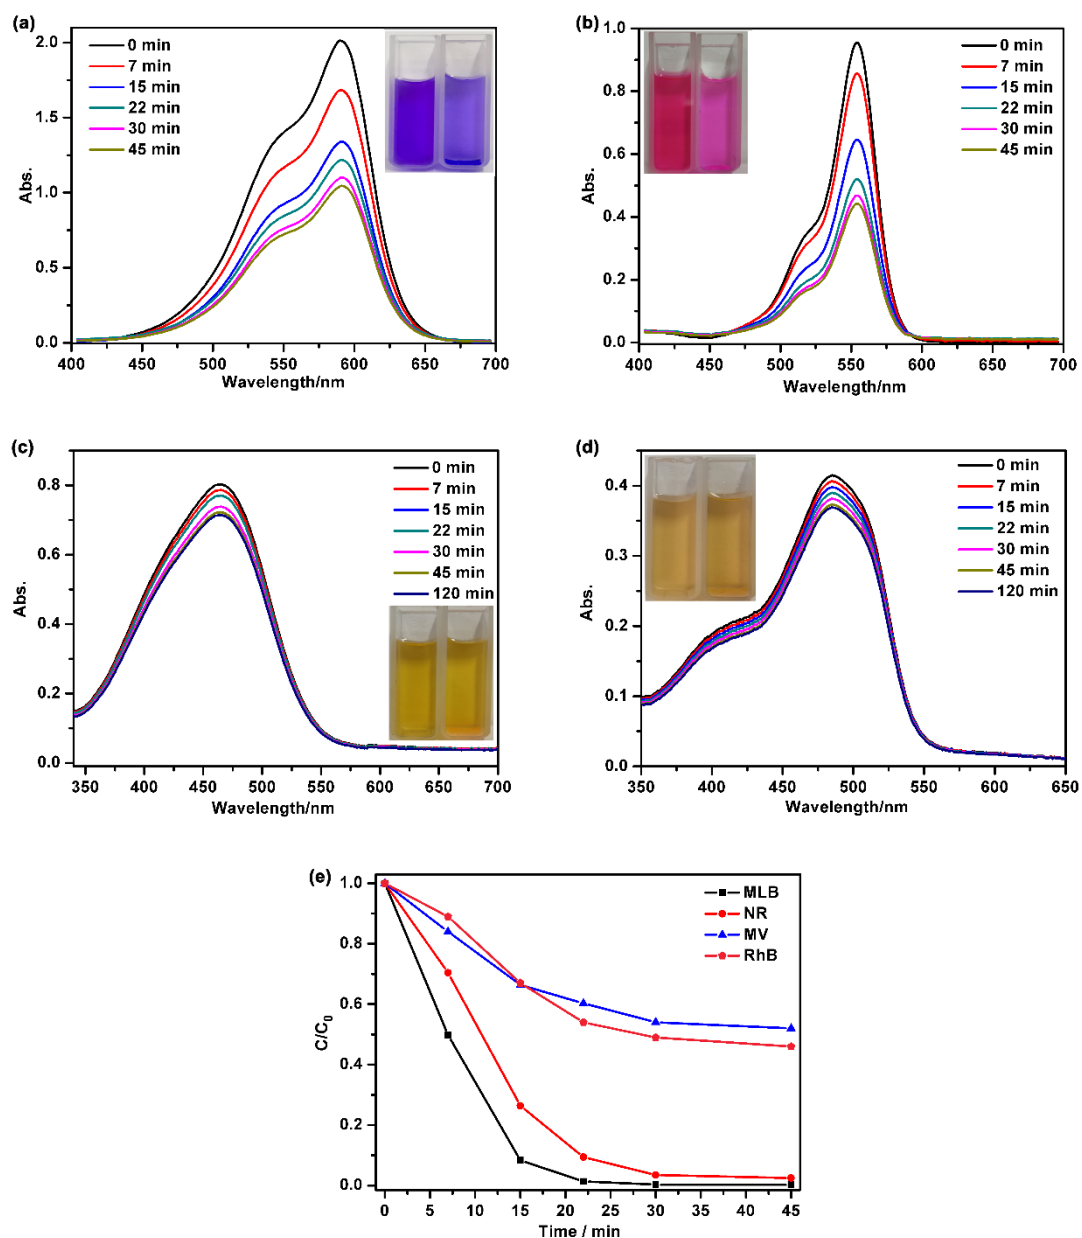

**Figure S3.** UV-vis spectra of MV (a), RhB (b), MO (c) and OrII (d) in aqueous solutions at different time; (e) the adsorption rate of MLB, NR, MV and RhB in **1**.

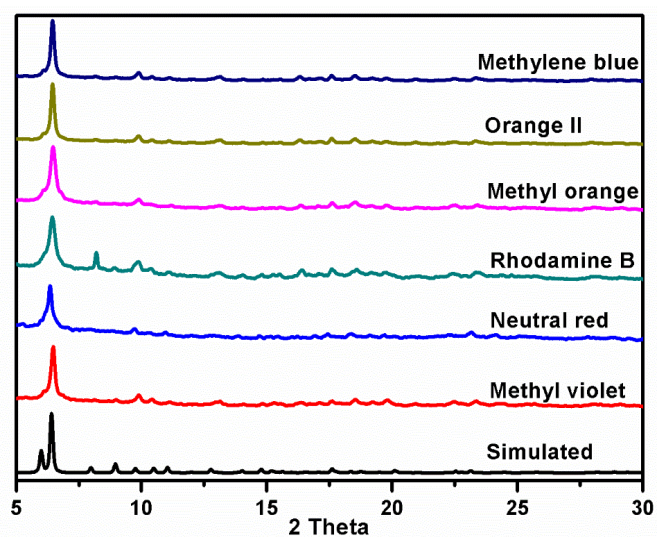

**Figure S4.** The PXRD patterns of **1** after immersing in different organic dyes.

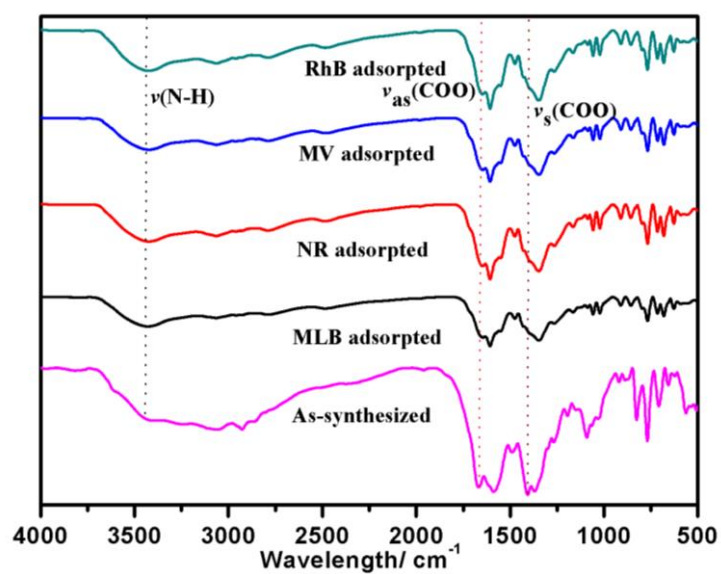

**Figure S5.** FT-IR spectra of **1** at the as-synthesized, MLB, NR, MV and RhB adsorbed states.

## Computational methods

Based on the density functional theory (DFT), we chose the Vienna Ab-initio Simulation Package (VASP) package for first-principle calculations. The generalized gradient approximation (GGA) with the Perdew–Burke–Ernzerhof (PBE) functional were used to describe the electronic exchange and correlation effects. Uniform G-centered k-points meshes with a resolution of  $2\pi \times 0.03 \text{ \AA}^{-1}$  and Methfessel-Paxton electronic smearing were adopted for the integration in the Brillouin zone for geometric optimization. The simulation was run with a cutoff energy of 500 eV throughout the computations. These settings ensure convergence of the total energies to within 1 meV per atom. Structure relaxation proceeded until all forces on atoms were less than 1 meV  $\text{\AA}^{-1}$  and the total stress tensor was within 0.01 GPa of the target value. The adsorption energy of molecule on MOF surface ( $\Delta E_{\text{adsorption}}$ ) was defined as

$$\Delta E_{\text{adsorption}} = E_{\text{MOF+dye}} - E_{\text{MOF}} - E_{\text{dye}}$$

where  $E_{\text{MOF+dye}}$ ,  $E_{\text{MOF}}$  and  $E_{\text{dye}}$  stand for the ground-state energies of the substrate binding with molecules.

**Table S1** The maximum adsorption amounts for MLB and NR on **1**, based on the data of different initial concentrations experiments.

| Dyes | 1   | 2   | 3   | 4   | 5   | Average<br>(mg/g) |
|------|-----|-----|-----|-----|-----|-------------------|
| MLB  | 415 | 412 | 408 | 400 | 418 | 410               |
| NR   | 200 | 200 | 210 | 205 | 198 | 202               |

**Table S2** Comparison of maximum adsorption amounts for MLB on various adsorbents.

| Adsorbent                                                                     | Q <sub>e</sub> (mg/g) | Solvent                          | Ref.             |
|-------------------------------------------------------------------------------|-----------------------|----------------------------------|------------------|
| CTS-g-PAA/10% VMT                                                             | 1685.6                | Water                            | 1                |
| MIL-100(Fe)                                                                   | 1105                  | Water                            | 2                |
| [Ca(HDCPP) <sub>2</sub> (H <sub>2</sub> O) <sub>2</sub> ](DMF) <sub>1.5</sub> | 952                   | Water                            | 3                |
| ZJU-24                                                                        | 902                   | Water                            | 4                |
| H <sub>3</sub> PW <sub>12</sub> O <sub>40</sub> @ZIF-8                        | 810                   | Water                            | 5                |
| MIL-100(Cr)                                                                   | 645                   | Water                            | 6                |
| PAC2                                                                          | 588                   | Water                            | 7                |
| <b>1</b>                                                                      | <b>410</b>            | <b>Water</b>                     | <b>This work</b> |
| Cd-MOF (2)                                                                    | 318                   | Water                            | 8                |
| JLU-Liu39                                                                     | 308                   | C <sub>2</sub> H <sub>5</sub> OH | 9                |
| Sr-BTTC                                                                       | 270                   | DMA                              | 10               |
| MOF-235                                                                       | 187                   | Water                            | 11               |

**Table S3** Molecular parameters of the dyes

| Dyes                      | Charge | Dimensions<br>(Å) | Molecular structure                                                                  |
|---------------------------|--------|-------------------|--------------------------------------------------------------------------------------|
| <b>Methylene<br/>blue</b> | +1     | 1.8×5.5×14.2      | 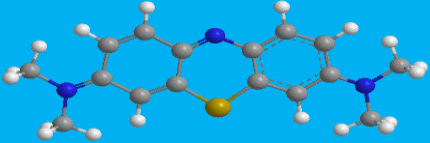   |
| <b>Neutral red</b>        | +1     | 2.3×6.4×12.6      |    |
| <b>Methyl<br/>violet</b>  | +1     | 3.5×13.0×13.7     |   |
| <b>Rhodamine<br/>B</b>    | +1     | 15.6×13.5×4.2     |  |
| <b>Methyl<br/>orange</b>  | -1     | 4.5×6.0×14.8      |  |
| <b>Orange II</b>          | -1     | 13.5×7.2×2.8      |  |

## Reference

1. Liu, Y.; Zheng, Y.; Wang, A. Enhanced adsorption of Methylene Blue from aqueous solution by chitosan-g-poly (acrylic acid)/vermiculite hydrogel composites. *J. Environ. Sci.* **2010**, *22*, 486–493.
2. Tan, F.; Liu, M.; Li, K.; Wang, Y.; Wang, J.; Guo, X.; Zhang, G.; Song, C. Facile synthesis of size-controlled MIL-100(Fe) with excellent adsorption capacity for methylene blue. *Chem. Eng. J.* **2015**, *281*, 360–367.
3. Hou, Y.; Sun, J.; Zhang, D.; Qi, D.; Jiang, J. Porphyrin–Alkaline Earth MOFs with the Highest Adsorption Capacity for Methylene Blue. *Chem. Eur. J.* **2016**, *22*, 6345–6352.
4. Zhang, Q.; Yu, J.; Cai, J.; Song, R.; Cui, Y.; Yang, Y.; Chen, B.; Qian, G. A porous metal-organic framework with -COOH groups for highly efficient pollutant removal. *Chem. Commun.* **2014**, *50*, 14455–14458.
5. Li, R.; Ren, X.; Zhao, J.; Feng, X.; Jiang, X.; Fan, X.; Lin, Z.; Li, X.; Hu, C.; Wang, B. Polyoxometallates trapped in a zeolitic imidazolate framework leading to high uptake and selectivity of bioactive molecules. *J. Mater. Chem. A* **2014**, *2*, 2168–2173.
6. Tong, M.; Liu, D.; Yang, Q.; Devautour-vinot, S.; Maurin, G.; Zhong, C. Influence of framework metal ions on the dye capture behavior of MIL-100 (Fe, Cr) MOF type solids. *J. Mater. Chem. A* **2013**, *1*, 8534–8537.
7. Qada, E. N.; Allen, S. J.; Walker, G. M. Adsorption of basic dyes from aqueous solution onto activated carbons. *Chem. Eng. J.* **2008**, *135*, 174–184.
8. Yi, F.-Y.; Li, J.-P.; Wu, D.; Sun, Z.-M. A Series of Multifunctional Metal–Organic Frameworks Showing Excellent Luminescent Sensing, Sensitization, and Adsorbent Abilities. *Chem. Eur. J.* **2015**, *21*, 11475–11482.
9. Yao, S.; Xu, T.; Zhao, N.; Zhang, L.; Huo, Q.; Liu, Y. An anionic metal–organic framework with ternary building units for rapid and selective adsorption of dyes. *Dalton Trans.* **2017**, *46*, 3332–3337.
10. Shen, Y.; Fan, C.-C.; Wei, Y.-Z.; Du, J.; Zhu, H.-B.; Zhao, Y. An anionic zeolite-like metal–organic framework (AZMOF) with a Moravia network for organic dye absorption through cation-exchange. *Dalton Trans.* **2016**, *45*, 10909–10915.
11. Haque, E.; Jun, J. W.; Jung, S. H. Adsorptive removal of methyl orange and methylene blue from aqueous solution with a metal-organic framework material, iron terephthalate (MOF-235). *J. Hazard. Mater.* **2011**, *185*, 507–511.
